# Supplementary material
Source: PubMed Central journal article supplement (PMC6233636)
Supplement: jamaotolaryngolheadnecksurg-144-816-s001.pdf [file jamaotolaryngolheadnecksurg-144-816-s001.pdf]

## Supplementary Online Content

de Vasconcellos SJdA, do Nascimento-Júnior EM, de Aguiar Menezes MV et al. Preoperative tranexamic acid for treatment of bleeding, edema, and ecchymosis in patients undergoing rhinoplasty: a systematic review and meta-analysis. *JAMA Otolaryngol Head Neck Surg*. Published online August 9, 2018. doi:10.1001/jamaoto.2018.1381

**eFigure 1.** PRISMA Flow Diagram

**eFigure 2.** Risk of Bias Assessment

**eFigure 3.** Efficacy of Tranexamic Acid on Upper Eyelid Edema Within the First Postoperative week

**eFigure 4.** Efficacy of Tranexamic Acid on Lower Eyelid Edema Within the First Postoperative Week

**eFigure 5.** Efficacy of Tranexamic Acid on Upper Eyelid Ecchymosis Within the First Postoperative Week

**eFigure 6.** Efficacy of Tranexamic Acid on Lower Eyelid Ecchymosis Within the First Postoperative Week

This supplementary material has been provided by the authors to give readers additional information about their work.

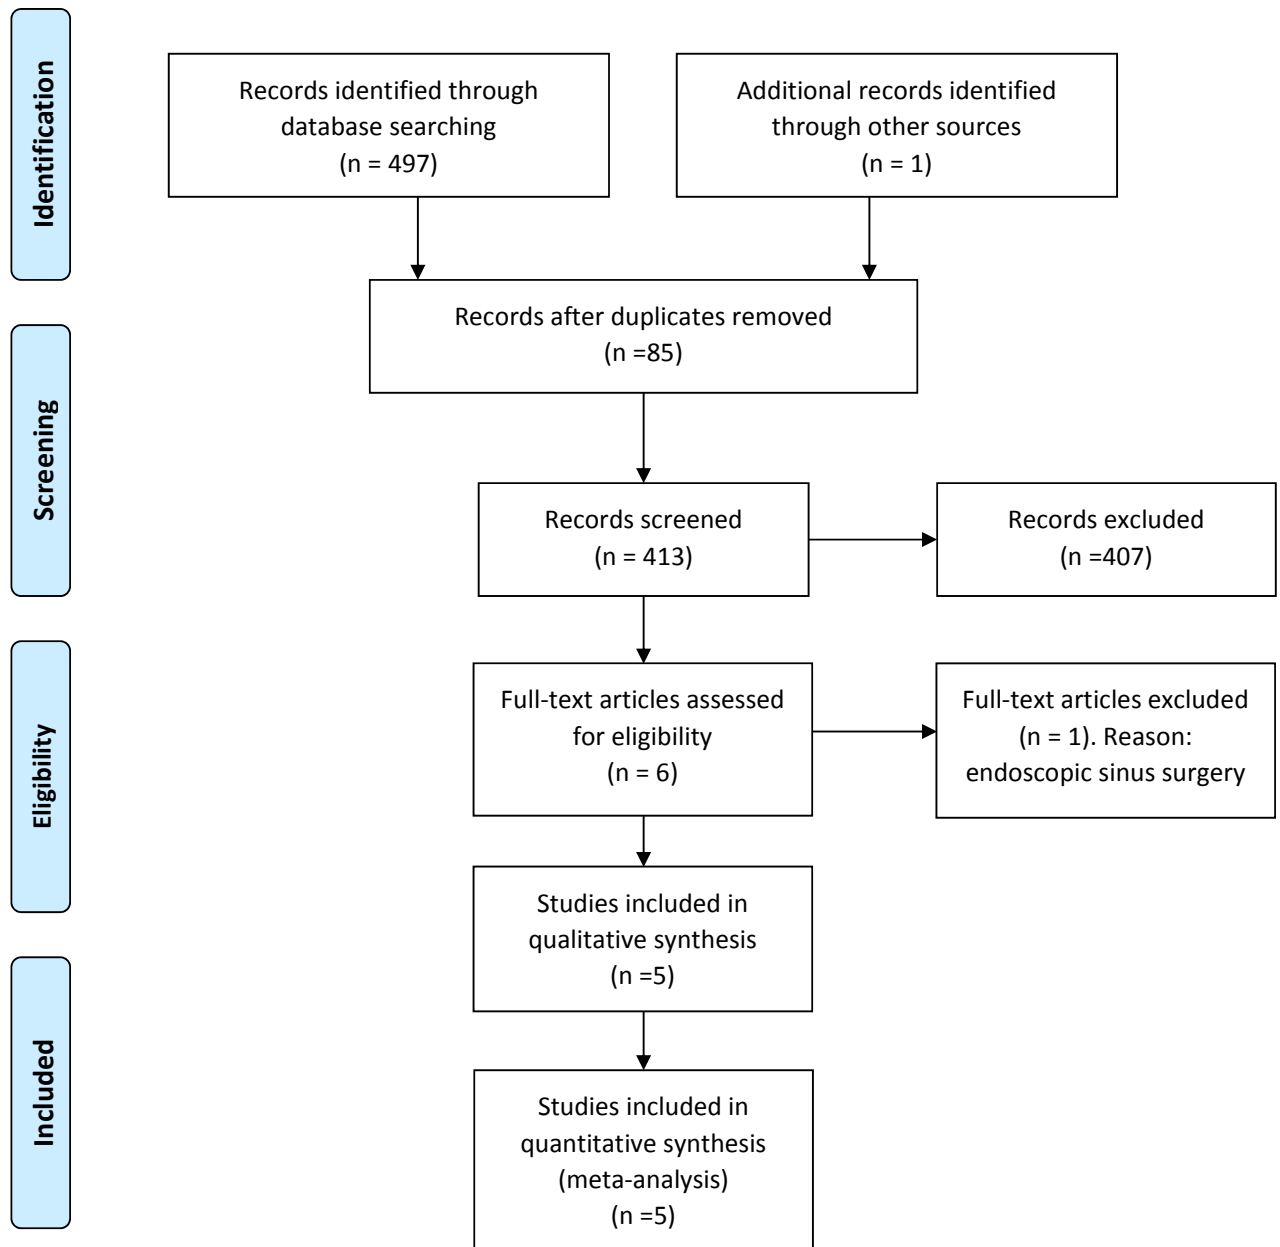

eFigure 1. PRISMA Flow Diagram

|                  | Random sequence generation (selection bias) | Allocation concealment (selection bias) | Blinding of participants and personnel (performance bias) | Blinding of outcome assessment (detection bias) | Incomplete outcome data (attrition bias) | Selective reporting (reporting bias) | Other bias |
|------------------|---------------------------------------------|-----------------------------------------|-----------------------------------------------------------|-------------------------------------------------|------------------------------------------|--------------------------------------|------------|
| Beikaei 2015     | +                                           | +                                       | +                                                         | +                                               | +                                        | ?                                    | +          |
| Eftekharian 2016 | +                                           | ?                                       | +                                                         | +                                               | +                                        | ?                                    | +          |
| Ghavami 2017     | +                                           | ?                                       | +                                                         | +                                               | +                                        | ?                                    | +          |
| Mehdizadeh 2018  | +                                           | ?                                       | +                                                         | +                                               | +                                        | ?                                    | +          |
| Sakallioglu 2015 | ?                                           | ?                                       | ?                                                         | ?                                               | +                                        | ?                                    | +          |

eFigure 2. Risk of bias assessment. Footnote:

(+) low risk of bias; (-) high risk of bias; (?) unclear risk of bias.

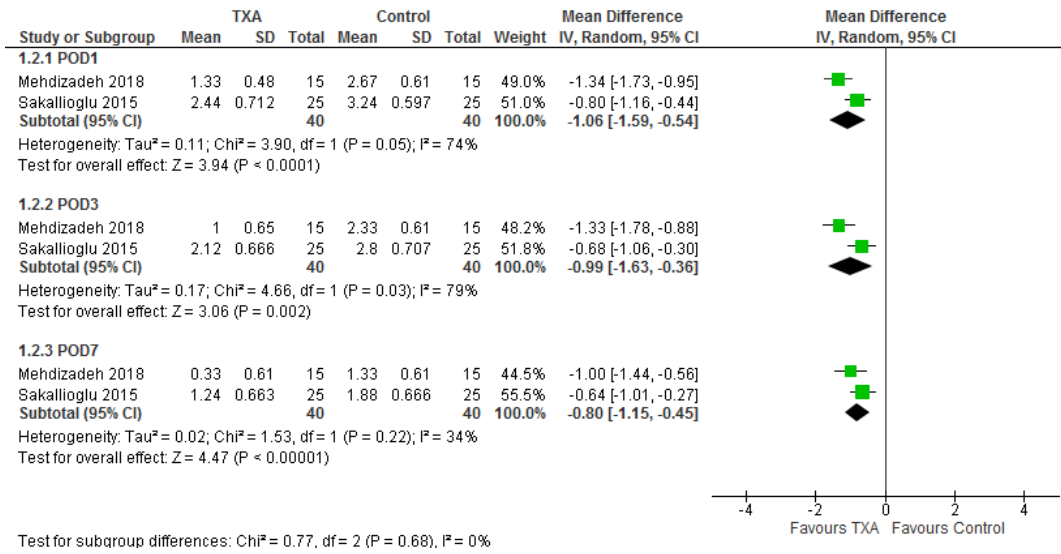

eFigure 3. Efficacy of tranexamic acid on upper eyelid edema within the first postoperative week.

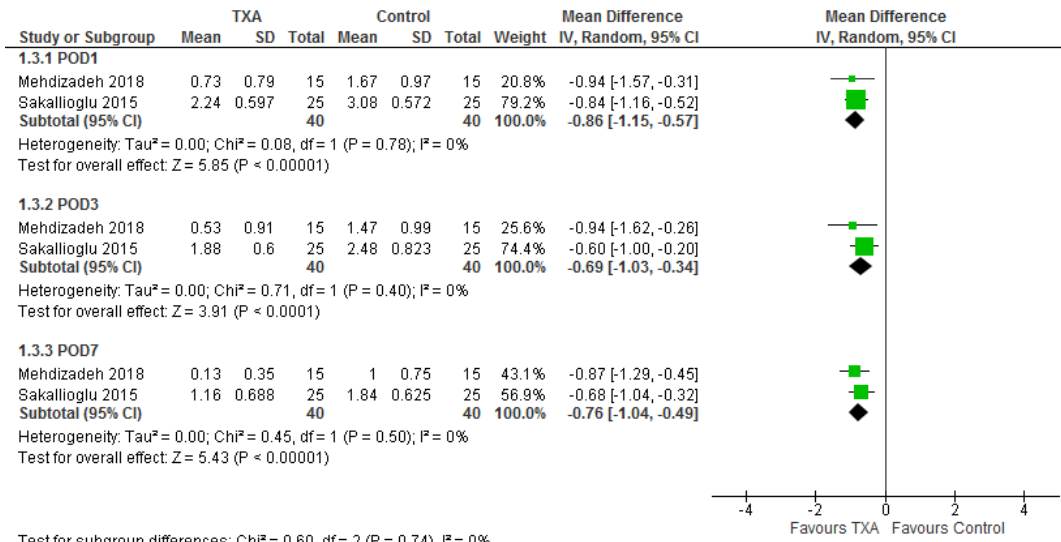

eFigure 4. Efficacy of tranexamic acid on lower eyelid edema within the first postoperative week.

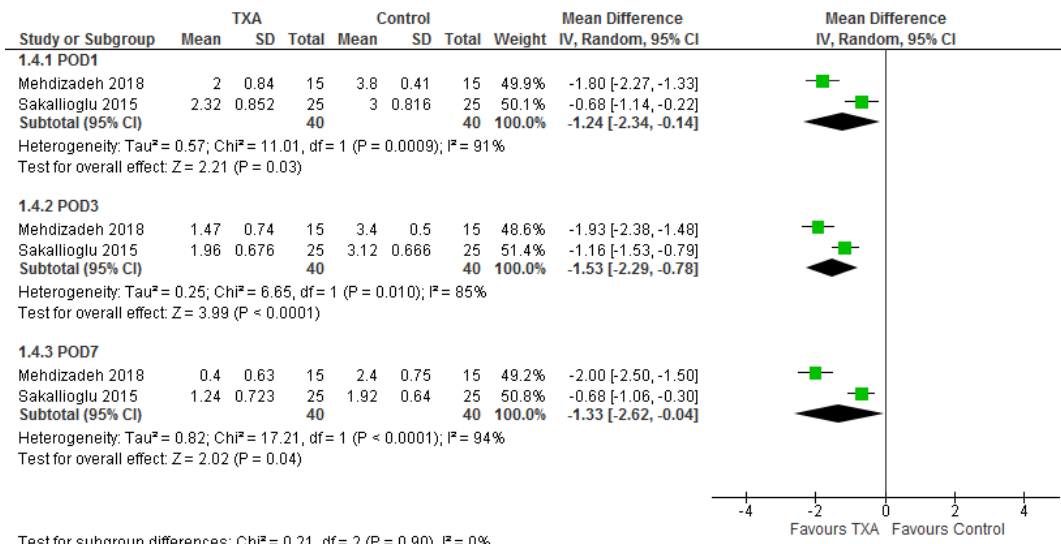

eFigure 5. Efficacy of tranexamic acid on upper eyelid ecchymosis within the first postoperative week.

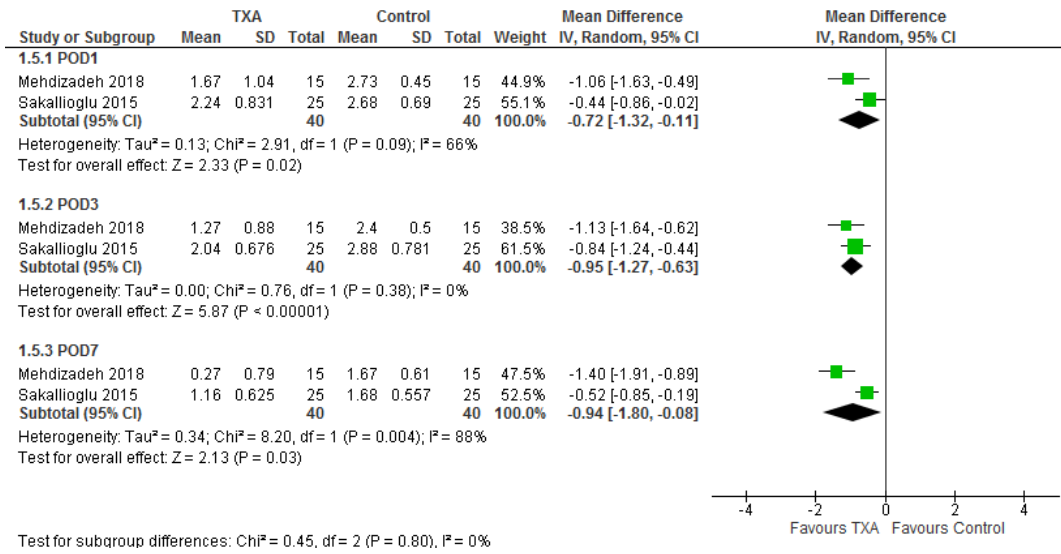

eFigure 6. Efficacy of tranexamic acid on lower eyelid ecchymosis within the first postoperative week.
